# Supplementary material for: Relativity as a Synthesis Design Principle: A Comparative Study of [3 + 2] Cycloaddition of Technetium(VII) and Rhenium(VII) Trioxo Complexes with Olefins
Source: PubMed Central journal article supplement (PMC8388117; doi:10.1021/acs.inorgchem.1c00995), 2021-07-13
Supplement: ic1c00995_si_001.pdf [file ic1c00995_si_001.pdf]

## Supporting Information

### Relativity as a Synthesis Design Principle: A Comparative Study of (3 + 2) Cycloaddition of Technetium(VII)- and Rhenium(VII)-Trioxo Complexes with Olefins

Henrik Braband,<sup>a</sup> Michael Benz,<sup>a</sup> Bernhard Spingler,<sup>a</sup> Jeanet Conradie,<sup>\*,b,c</sup>  
Roger Alberto,<sup>\*,b</sup> Abhik Ghosh<sup>\*,b</sup>

Department of Chemistry, University of Zurich, 8057 Zürich, Switzerland; <sup>b</sup>Department of Chemistry, UiT – The Arctic University of Norway, N-9037 Tromsø, Norway; <sup>c</sup>Department of Chemistry, University of the Free State, P.O. Box 339, Bloemfontein, 9300, South Africa.

| <b>Contents</b>                        | <b>Page</b> |
|----------------------------------------|-------------|
| A. Selected spectra                    | S2          |
| B. Additional crystallographic details | S5          |
| C. Additional DFT data                 | S7          |
| D, E. Selected optimized coordinates   | S8          |

## A. Selected spectra

*Note:* The two diastereomers of  $[\{^{99}\text{Tc}^{\text{V}}(\text{O})\text{O}_2(\text{tacn})\}_2(2\text{MByOH})]\text{Cl}_2$  could not be separated and individually characterized. The following spectra thus show a mixture of the two diastereomers.

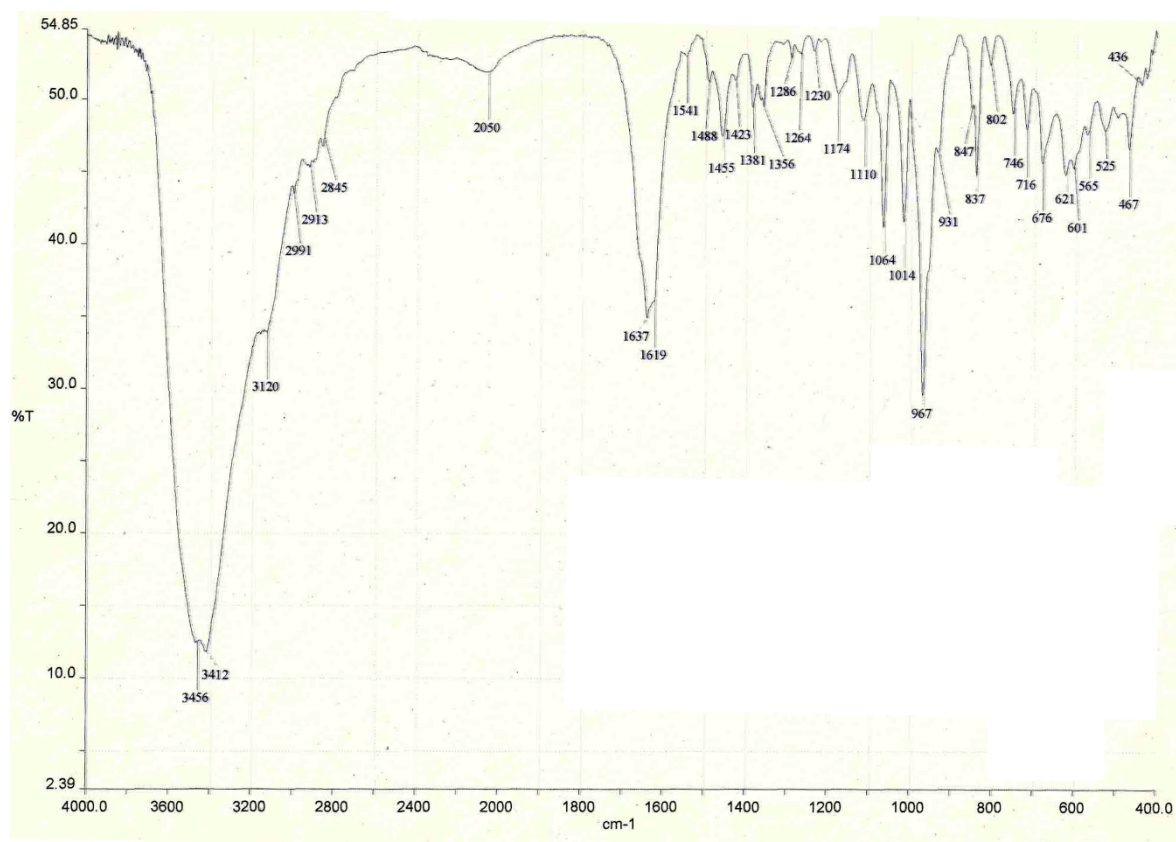

Figure S1. IR spectrum of  $[\{^{99}\text{Tc}^{\text{V}}(\text{O})\text{O}_2(\text{tacn})\}_2(2\text{MByOH})]\text{Cl}_2$ .

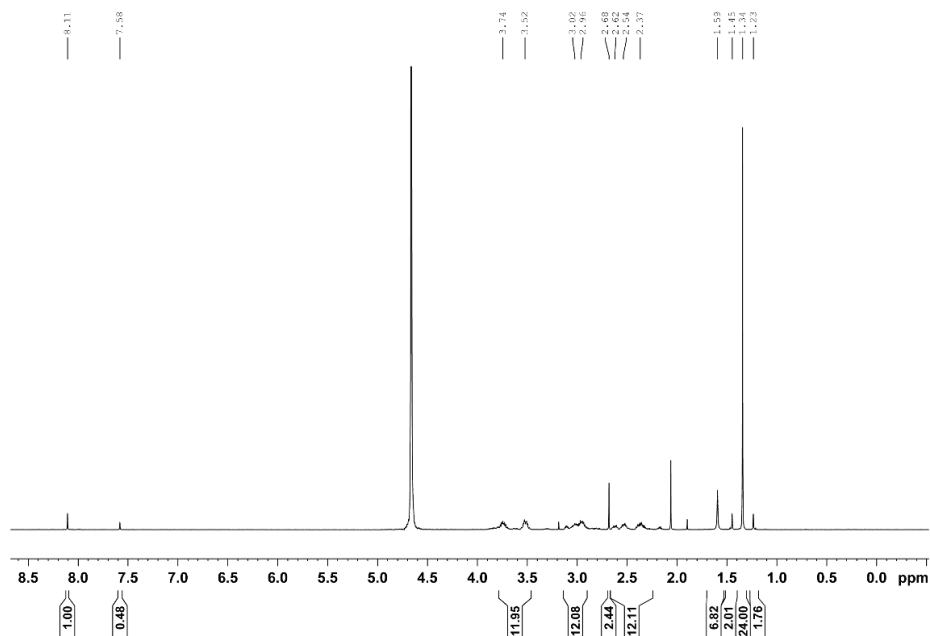

Figure S2.  $^1\text{H}$  NMR spectrum of  $[\{^{99}\text{Tc}^{\text{V}}(\text{O})\text{O}_2(\text{tacn})\}_2(2\text{MByOH})]\text{Cl}_2$  ( $\text{D}_2\text{O}$ , 293 K). Signals at 2.68 and 1.34 ppm have been assigned to 2-methyl-3-butyn-2-ol.

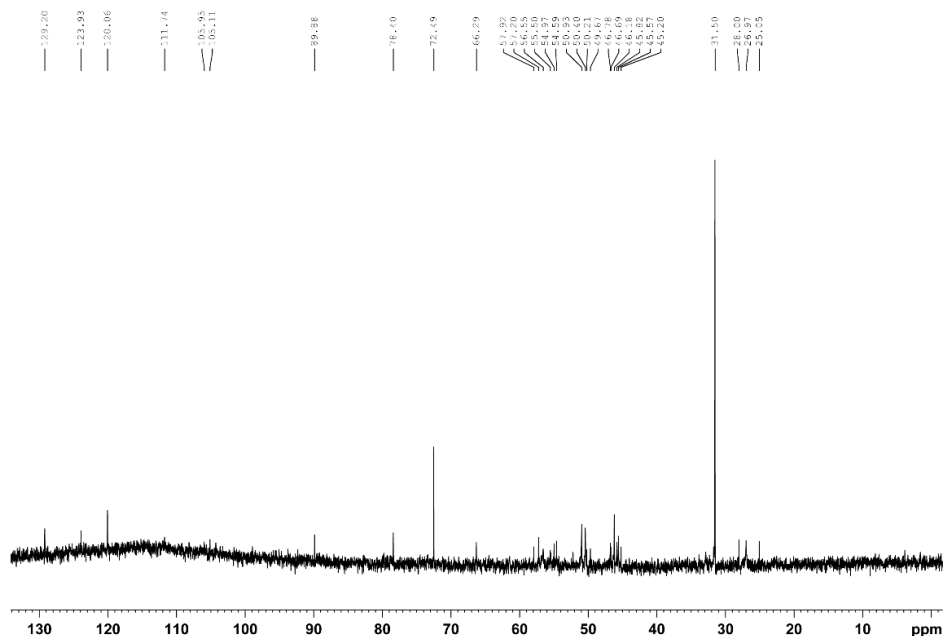

Figure S3.  $^{13}\text{C}$  NMR spectrum of  $[\{^{99}\text{Tc}^{\text{V}}(\text{O})\text{O}_2(\text{tacn})\}_2(2\text{MByOH})]\text{Cl}_2$  ( $\text{D}_2\text{O}$ , 293 K). Signals at 89.88, 72.49, 66.29 and 31.50 ppm have been assigned to 2-methyl-3-butyn-2-ol.

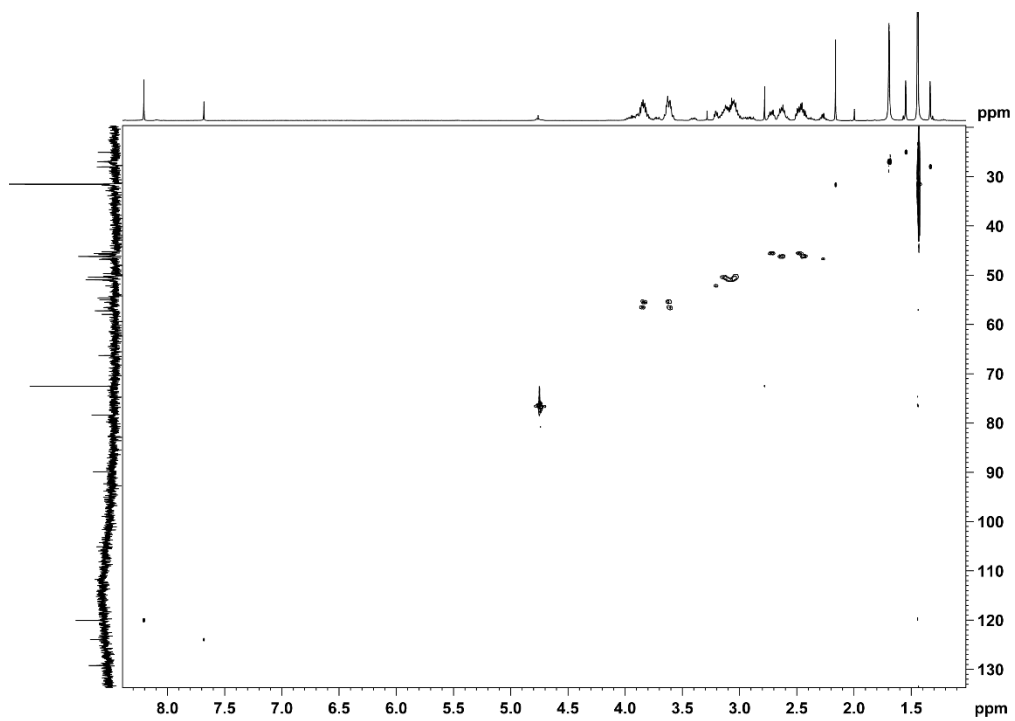

Figure S4.  $^{13}\text{C}$ - $^1\text{H}$  correlation spectrum of  $[\{^{99}\text{Tc}^{\text{V}}(\text{O})\text{O}_2(\text{tacn})\}_2(2\text{MByOH})]\text{Cl}_2$  ( $\text{D}_2\text{O}$ , 293 K).

## B. Additional crystallographic details

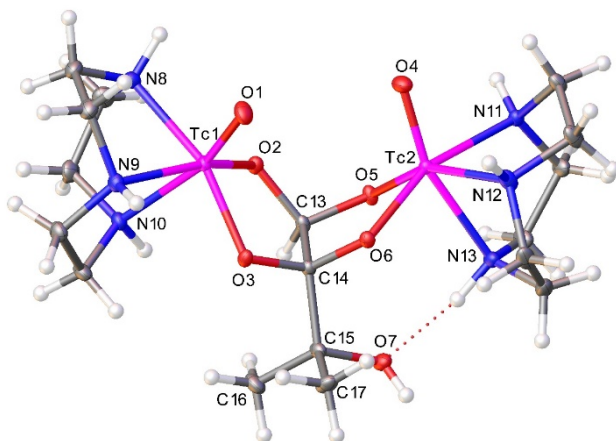

Figure S5. Thermal ellipsoid plot (50% probability) for  $[\{^{99}\text{Tc}^{\text{V}}(\text{O})\text{O}_2(\text{tacn})\}_2-(2\text{MByOH})\text{Br}_2 \cdot 2.2(\text{H}_2\text{O})$ .

Table S1. Bond lengths for  $[\{^{99}\text{Tc}^{\text{V}}(\text{O})\text{O}_2(\text{tacn})\}_2(2\text{MByOH})\text{Br}_2 \cdot 2.2(\text{H}_2\text{O})$ .

|         |           |
|---------|-----------|
| Tc1—N10 | 2.295 (4) |
| Tc1—N9  | 2.175 (4) |
| Tc1—N8  | 2.163 (4) |
| Tc1—O1  | 1.661 (3) |
| Tc1—O2  | 1.926 (3) |
| Tc1—O3  | 1.936 (3) |
| Tc2—N13 | 2.250 (4) |
| Tc2—N12 | 2.147 (4) |
| Tc2—N11 | 2.185 (3) |
| Tc2—O4  | 1.665 (3) |
| Tc2—O5  | 1.946 (3) |
| Tc2—O6  | 1.942 (3) |
| C13—C14 | 1.544 (5) |

Table S2. Selected bond angles for [ $\{^{99}\text{Tc}^{\text{V}}(\text{O})\text{O}_2(\text{tacn})\}_2\text{-}(2\text{MByOH})\text{]Br}_2 \cdot 2.2(\text{H}_2\text{O})$ .

|             |             |             |             |
|-------------|-------------|-------------|-------------|
| N9—Tc1—N10  | 74.80 (13)  | N12—Tc2—N13 | 75.55 (16)  |
| N8—Tc1—N10  | 75.04 (14)  | N12—Tc2—N11 | 80.12 (14)  |
| N8—Tc1—N9   | 79.99 (14)  | N11—Tc2—N13 | 75.02 (13)  |
| O1—Tc1—N10  | 162.07 (15) | O4—Tc2—N13  | 161.23 (15) |
| O1—Tc1—N9   | 89.61 (16)  | O4—Tc2—N12  | 96.98 (17)  |
| O1—Tc1—N8   | 93.83 (17)  | O4—Tc2—N11  | 86.82 (15)  |
| O1—Tc1—O2   | 112.86 (16) | O4—Tc2—O5   | 108.23 (16) |
| O1—Tc1—O3   | 107.08 (16) | O4—Tc2—O6   | 112.55 (14) |
| O2—Tc1—N10  | 82.37 (13)  | O5—Tc2—N13  | 79.62 (14)  |
| O2—Tc1—N9   | 157.17 (13) | O5—Tc2—N12  | 154.66 (15) |
| O2—Tc1—N8   | 93.97 (14)  | O5—Tc2—N11  | 98.36 (13)  |
| O2—Tc1—O3   | 81.73 (12)  | O6—Tc2—N13  | 85.16 (13)  |
| O3—Tc1—N10  | 83.72 (13)  | O6—Tc2—N12  | 91.46 (13)  |
| O3—Tc1—N9   | 95.91 (13)  | O6—Tc2—N11  | 159.82 (13) |
| O3—Tc1—N8   | 158.73 (14) | O6—Tc2—O5   | 81.42 (12)  |
| O2—C13—C14  | 108.5 (3)   | O3—C14—C15  | 105.7 (3)   |
| O5—C13—C14  | 110.6 (3)   | O3—C14—O6   | 108.8 (3)   |
| O5—C13—O2   | 107.6 (3)   | O6—C14—C13  | 106.9 (3)   |
| C13—C14—C15 | 117.3 (3)   | O6—C14—C15  | 109.1 (3)   |
| O3—C14—C13  | 108.8 (3)   |             |             |

### C. DFT data.

Table S3. Imaginary frequency for the transition state of the indicated reactions, obtained in CH<sub>3</sub>CN with the indicated methods.

| Reaction                                            | B3LYP <sub>scalar</sub> <sup>a</sup> | B3LYP <sub>nrel</sub> <sup>a</sup> | PBE0 <sub>scalar</sub> <sup>a</sup> | PBE0 <sub>scalar</sub> <sup>a</sup> | OPBE0 <sub>scalar</sub> <sup>a</sup> | PBE-D2 <sub>ECP</sub> <sup>b</sup> |
|-----------------------------------------------------|--------------------------------------|------------------------------------|-------------------------------------|-------------------------------------|--------------------------------------|------------------------------------|
| [Re(tacn)O <sub>3</sub> ] <sup>+</sup> + propene    | -453.2                               | -382.6                             | -534.4                              | -423.7                              | -533.9                               | -426.8                             |
| [Tc(tacn)O <sub>3</sub> ] <sup>+</sup> + propene    | -475.1                               | -331.9                             | -415.0                              | -363.6                              | -417.2                               | -289.4                             |
| [Re(tacn)O <sub>3</sub> ] <sup>+</sup> + ketene     | -558.6                               | -390.4                             | -384.7                              | -419.2                              | -407.0                               | -360.4                             |
| [Tc(tacn)O <sub>3</sub> ] <sup>+</sup> + ketene     | -487.2                               | -381.0                             | -287.3                              | -384.9                              | -440.5                               | -328.8                             |
| [Re(tacn)O <sub>3</sub> ] <sup>+</sup> + 2-butyne   | -446.3                               | -351.0                             | -481.2                              | -395.5                              | -486.5                               | -365.7                             |
| [Tc(tacn)O <sub>3</sub> ] <sup>+</sup> + 2-butyne   | -356.6                               | -325.9                             | -417.8                              | -366.2                              | -410.2                               | -262.9                             |
| [Re(tacn)O <sub>3</sub> ] <sup>+</sup> + norbornene | -405.7                               | -231.2                             | -436.6                              | -293.4                              | -438.8                               | -324.7                             |
| Tc(tacn)O <sub>3</sub> <sup>+</sup> + norbornene    | -253.8                               | -189.1                             | -394.2                              | -232.9                              | -308.7                               | -73.72                             |

<sup>a</sup> Obtained with ADF; <sup>b</sup> Obtained with Gaussian.

## D. B3LYP/ZORA-STO-TZ2P optimized coordinates (Å)

### (a) 2-butyne

|   |              |              |              |
|---|--------------|--------------|--------------|
| C | -2.047750000 | 0.068221000  | -2.258269000 |
| C | -2.051166000 | 0.045843000  | -3.716039000 |
| C | -2.054342000 | 0.025616000  | -4.916679000 |
| C | -2.058070000 | 0.001650000  | -6.374351000 |
| H | -1.040424000 | -0.013695000 | -6.770375000 |
| H | -1.444929000 | 0.896007000  | -1.878472000 |
| H | -1.635921000 | -0.857835000 | -1.851763000 |
| H | -2.560728000 | 0.881684000  | -6.781261000 |
| H | -2.576116000 | -0.882379000 | -6.752231000 |
| H | -3.059733000 | 0.183925000  | -1.864125000 |

### (b) dimethylketene

|   |              |              |              |
|---|--------------|--------------|--------------|
| C | 0.094019000  | 1.498629000  | 0.200791000  |
| C | -0.354385000 | 0.066195000  | 0.010677000  |
| C | -0.554904000 | -0.714228000 | 1.042254000  |
| C | -0.573762000 | -0.452491000 | -1.393971000 |
| H | 0.222587000  | 1.754656000  | 1.251757000  |
| H | 0.347294000  | -0.374552000 | -1.979131000 |
| H | 1.047298000  | 1.672405000  | -0.306670000 |
| H | -0.639074000 | 2.189114000  | -0.227059000 |
| H | -0.889037000 | -1.495210000 | -1.403921000 |
| H | -1.341322000 | 0.136788000  | -1.904372000 |
| O | -0.732459000 | -1.413388000 | 1.962006000  |

### (c) norbornene

|   |              |              |              |
|---|--------------|--------------|--------------|
| C | 1.305551000  | -0.553198000 | 1.804782000  |
| C | 1.316367000  | -0.530661000 | -0.449211000 |
| C | 1.325857000  | -2.077450000 | 1.442022000  |
| C | 1.332590000  | -2.062031000 | -0.116875000 |
| C | 2.214987000  | 0.008845000  | 0.687753000  |
| C | -0.037747000 | -0.015161000 | 0.009748000  |
| C | -0.043452000 | -0.026528000 | 1.344005000  |
| H | 0.467524000  | -2.604084000 | 1.856937000  |
| H | 0.476327000  | -2.578337000 | -0.548760000 |
| H | 1.583053000  | -0.333720000 | 2.833265000  |
| H | 1.603805000  | -0.290529000 | -1.470318000 |
| H | 2.228010000  | -2.547729000 | 1.836010000  |
| H | 2.236826000  | -2.526326000 | -0.513142000 |
| H | 2.277129000  | 1.096647000  | 0.698701000  |
| H | 3.219077000  | -0.420770000 | 0.688047000  |
| H | -0.871151000 | 0.203158000  | -0.643773000 |
| H | -0.882561000 | 0.177910000  | 1.995005000  |



**(d) propene**

|   |              |              |              |
|---|--------------|--------------|--------------|
| C | -2.440625000 | 0.129464000  | -0.924920000 |
| C | -2.907222000 | -0.120685000 | -2.141750000 |
| C | -2.946314000 | -0.488761000 | 0.342473000  |
| H | -1.626549000 | 0.841901000  | -0.816228000 |
| H | -2.148924000 | -1.031408000 | 0.857772000  |
| H | -2.496481000 | 0.363203000  | -3.018469000 |
| H | -3.301823000 | 0.278789000  | 1.035618000  |
| H | -3.718453000 | -0.821552000 | -2.306779000 |
| H | -3.765113000 | -1.183172000 | 0.149839000  |

**(e) [Re(tacn)O<sub>3</sub>]<sup>+</sup>**

|    |             |              |             |
|----|-------------|--------------|-------------|
| C  | 2.077929000 | 2.335108000  | 2.863501000 |
| C  | 2.235691000 | 0.883179000  | 3.315482000 |
| C  | 3.531611000 | 4.341959000  | 3.265399000 |
| C  | 4.688837000 | 0.624149000  | 2.850805000 |
| C  | 4.861460000 | 3.738160000  | 2.813807000 |
| C  | 5.878715000 | 1.489019000  | 3.267117000 |
| H  | 1.022438000 | 2.562781000  | 2.720868000 |
| H  | 1.531231000 | 0.651662000  | 4.110950000 |
| H  | 1.935621000 | 3.719766000  | 4.391930000 |
| H  | 2.048297000 | 0.208616000  | 2.477898000 |
| H  | 2.567000000 | 2.495948000  | 1.904575000 |
| H  | 3.033034000 | 4.822999000  | 2.421650000 |
| H  | 3.601474000 | -0.180977000 | 4.413038000 |
| H  | 3.694227000 | 5.086037000  | 4.041754000 |
| H  | 4.279987000 | 0.961575000  | 1.900102000 |
| H  | 4.743647000 | 3.207238000  | 1.871016000 |
| H  | 5.015260000 | -0.404818000 | 2.705423000 |
| H  | 5.585964000 | 4.532434000  | 2.639625000 |
| H  | 6.145811000 | 3.212047000  | 4.345335000 |
| H  | 6.451421000 | 0.998907000  | 4.051295000 |
| H  | 6.535115000 | 1.658569000  | 2.411457000 |
| N  | 2.679100000 | 3.277263000  | 3.858035000 |
| N  | 3.598938000 | 0.680737000  | 3.873815000 |
| N  | 5.386300000 | 2.774168000  | 3.830092000 |
| O  | 2.429195000 | 1.687874000  | 6.201316000 |
| O  | 4.154662000 | 3.845180000  | 6.158877000 |
| O  | 5.160666000 | 1.272386000  | 6.172418000 |
| Re | 3.907178000 | 2.262226000  | 5.561114000 |

**(f) [Re(tacn)O<sub>3</sub>]<sup>+</sup> + dimethylketene product**

|   |              |              |             |
|---|--------------|--------------|-------------|
| C | 0.379004000  | 2.171297000  | 5.885038000 |
| C | 1.462806000  | 1.510793000  | 9.372540000 |
| C | 1.822190000  | 1.811536000  | 7.915400000 |
| C | -0.349375000 | -0.181803000 | 8.996074000 |
| C | -0.424895000 | 0.882509000  | 6.042414000 |
| C | -1.554006000 | -0.124417000 | 8.063056000 |
| C | -3.349656000 | 4.229822000  | 7.420133000 |
| C | -3.427505000 | 5.672691000  | 7.928137000 |

|    |              |              |              |
|----|--------------|--------------|--------------|
| C  | -3.846871000 | 3.272420000  | 8.515123000  |
| C  | -4.157011000 | 4.037614000  | 6.139148000  |
| H  | 0.225338000  | 0.040263000  | 6.271311000  |
| H  | 0.520185000  | -0.589539000 | 8.483086000  |
| H  | 1.167951000  | 3.606796000  | 7.108004000  |
| H  | 1.254848000  | 2.003570000  | 5.255406000  |
| H  | 1.648288000  | 2.380937000  | 9.997477000  |
| H  | 1.922315000  | 0.890276000  | 7.345847000  |
| H  | 2.082421000  | 0.688192000  | 9.736673000  |
| H  | 2.789868000  | 2.309858000  | 7.879460000  |
| H  | -0.232385000 | 1.231078000  | 10.493308000 |
| H  | -0.233353000 | 2.950651000  | 5.435137000  |
| H  | -0.561255000 | -0.846264000 | 9.832159000  |
| H  | -0.924218000 | 0.644674000  | 5.103376000  |
| H  | -1.650765000 | -1.065307000 | 7.516790000  |
| H  | -2.327226000 | 1.234237000  | 6.745387000  |
| H  | -2.466715000 | 0.038754000  | 8.633436000  |
| H  | -2.821372000 | 5.809003000  | 8.824210000  |
| H  | -3.063281000 | 6.349140000  | 7.155207000  |
| H  | -3.790099000 | 4.716313000  | 5.369557000  |
| H  | -4.077687000 | 3.014332000  | 5.766197000  |
| H  | -4.459117000 | 5.927477000  | 8.166534000  |
| H  | -5.208993000 | 4.245310000  | 6.326277000  |
| N  | 0.006025000  | 1.185265000  | 9.506963000  |
| N  | 0.783644000  | 2.674500000  | 7.234001000  |
| N  | -1.416015000 | 1.034925000  | 7.145306000  |
| O  | -0.248278000 | 3.984274000  | 9.551312000  |
| O  | -1.963780000 | 3.901433000  | 7.145281000  |
| O  | -2.840453000 | 2.524035000  | 9.063120000  |
| O  | -4.982882000 | 3.154245000  | 8.865850000  |
| Re | -1.009413000 | 2.924558000  | 8.491827000  |

**(g) [Re(tacn)O<sub>3</sub>]<sup>+</sup> + 2-butyne product**

|   |              |              |              |
|---|--------------|--------------|--------------|
| C | 0.087371000  | 1.990959000  | 6.054631000  |
| C | 0.107700000  | -1.311466000 | 7.671206000  |
| C | 0.407638000  | 0.501889000  | 5.962717000  |
| C | 0.588189000  | 1.742290000  | 9.718755000  |
| C | 0.762390000  | -0.619153000 | 8.867712000  |
| C | 0.936729000  | 2.418025000  | 8.392263000  |
| C | -3.461496000 | 3.152681000  | 8.665009000  |
| C | -3.695299000 | 2.880085000  | 7.378461000  |
| C | -4.055700000 | 4.172911000  | 9.570472000  |
| C | -4.635060000 | 3.506043000  | 6.409505000  |
| H | 0.377236000  | 0.180482000  | 4.922493000  |
| H | 0.858533000  | -1.886945000 | 7.125011000  |
| H | 0.918962000  | 2.579284000  | 5.659467000  |
| H | 0.992965000  | -1.360657000 | 9.631364000  |
| H | 1.224056000  | 3.453476000  | 8.573668000  |
| H | 1.414236000  | 0.299069000  | 6.324902000  |
| H | 1.490540000  | 1.573150000  | 10.309632000 |
| H | 1.706187000  | -0.160921000 | 8.579526000  |

|    |              |              |              |
|----|--------------|--------------|--------------|
| H  | 1.791551000  | 1.935024000  | 7.922124000  |
| H  | -0.097031000 | 2.362408000  | 10.293357000 |
| H  | -0.497533000 | 0.123283000  | 10.337885000 |
| H  | -0.670559000 | -1.993152000 | 8.006458000  |
| H  | -0.724957000 | 3.228431000  | 7.469888000  |
| H  | -0.805696000 | 2.219901000  | 5.476050000  |
| H  | -1.169375000 | -0.815552000 | 6.145153000  |
| H  | -3.276843000 | 4.796246000  | 10.016936000 |
| H  | -4.100710000 | 3.864020000  | 5.526045000  |
| H  | -4.596516000 | 3.691851000  | 10.389012000 |
| H  | -4.749306000 | 4.819818000  | 9.037289000  |
| H  | -5.164472000 | 4.345187000  | 6.856058000  |
| H  | -5.373984000 | 2.776852000  | 6.068734000  |
| N  | -0.124465000 | 0.454746000  | 9.452794000  |
| N  | -0.223014000 | 2.344466000  | 7.461412000  |
| N  | -0.557049000 | -0.309420000 | 6.777860000  |
| O  | -2.494122000 | 2.336199000  | 9.255883000  |
| O  | -2.716210000 | -0.554696000 | 8.582712000  |
| O  | -2.922170000 | 1.843077000  | 6.857444000  |
| Re | -1.885332000 | 0.854887000  | 8.171232000  |

**(h) [Re(tacn)O<sub>3</sub>]<sup>+</sup> + norbornene product**

|   |              |              |              |
|---|--------------|--------------|--------------|
| C | 0.024771000  | -1.291971000 | 7.878091000  |
| C | 0.148791000  | 1.855065000  | 5.990000000  |
| C | 0.397620000  | 0.350510000  | 6.022417000  |
| C | 0.636996000  | 1.897834000  | 9.663516000  |
| C | 0.703163000  | -0.531618000 | 9.021360000  |
| C | 1.017801000  | 2.434717000  | 8.284395000  |
| C | -3.434236000 | 3.412148000  | 8.553102000  |
| C | -3.710254000 | 2.955553000  | 7.090012000  |
| C | -4.807711000 | 3.265772000  | 9.234976000  |
| C | -5.210577000 | 2.606064000  | 7.105686000  |
| C | -5.397929000 | 2.030626000  | 8.524402000  |
| C | -5.702304000 | 4.399227000  | 8.678605000  |
| C | -5.982182000 | 3.942710000  | 7.211353000  |
| H | 0.350363000  | -0.052912000 | 5.011961000  |
| H | 0.757503000  | -1.935459000 | 7.385261000  |
| H | 0.893919000  | -1.220637000 | 9.843140000  |
| H | 1.008750000  | 2.367273000  | 5.551531000  |
| H | 1.357974000  | 3.466426000  | 8.373955000  |
| H | 1.395010000  | 0.131925000  | 6.400908000  |
| H | 1.530423000  | 1.746979000  | 10.273096000 |
| H | 1.670474000  | -0.146122000 | 8.705801000  |
| H | 1.846842000  | 1.869762000  | 7.861889000  |
| H | -0.022282000 | 2.597403000  | 10.174040000 |
| H | -0.516575000 | 0.389654000  | 10.420127000 |
| H | -0.596246000 | 3.244320000  | 7.292861000  |
| H | -0.731619000 | 2.076437000  | 5.389845000  |
| H | -0.777782000 | -1.915948000 | 8.263021000  |
| H | -1.231094000 | -0.880056000 | 6.311010000  |
| H | -3.060435000 | 4.436240000  | 8.624240000  |

|    |              |              |              |
|----|--------------|--------------|--------------|
| H  | -3.489444000 | 3.726702000  | 6.348087000  |
| H  | -4.739783000 | 3.233596000  | 10.320129000 |
| H  | -4.856293000 | 1.105477000  | 8.708724000  |
| H  | -5.216864000 | 5.374394000  | 8.731929000  |
| H  | -5.506229000 | 1.977061000  | 6.268789000  |
| H  | -5.653604000 | 4.673506000  | 6.471055000  |
| H  | -6.446235000 | 1.866471000  | 8.773994000  |
| H  | -6.624322000 | 4.466444000  | 9.254487000  |
| H  | -7.045508000 | 3.773593000  | 7.047717000  |
| N  | -0.129868000 | 0.626844000  | 9.511590000  |
| N  | -0.145371000 | 2.338165000  | 7.359961000  |
| N  | -0.600421000 | -0.345259000 | 6.900259000  |
| O  | -2.420678000 | 2.563187000  | 9.132040000  |
| O  | -2.692790000 | -0.385001000 | 8.770574000  |
| O  | -2.865625000 | 1.828293000  | 6.775084000  |
| Re | -1.888409000 | 0.982460000  | 8.192878000  |

**(i) [Re(tacn)O<sub>3</sub>]<sup>+</sup> + propene product**

|   |              |              |              |
|---|--------------|--------------|--------------|
| C | 0.087371000  | 1.990959000  | 6.054631000  |
| C | 0.107700000  | -1.311466000 | 7.671206000  |
| C | 0.407638000  | 0.501889000  | 5.962717000  |
| C | 0.588189000  | 1.742290000  | 9.718755000  |
| C | 0.762390000  | -0.619153000 | 8.867712000  |
| C | 0.936729000  | 2.418025000  | 8.392263000  |
| C | -3.461496000 | 3.152681000  | 8.665009000  |
| C | -3.695299000 | 2.880085000  | 7.378461000  |
| C | -4.055700000 | 4.172911000  | 9.570472000  |
| C | -4.635060000 | 3.506043000  | 6.409505000  |
| H | 0.377236000  | 0.180482000  | 4.922493000  |
| H | 0.858533000  | -1.886945000 | 7.125011000  |
| H | 0.918962000  | 2.579284000  | 5.659467000  |
| H | 0.992965000  | -1.360657000 | 9.631364000  |
| H | 1.224056000  | 3.453476000  | 8.573668000  |
| H | 1.414236000  | 0.299069000  | 6.324902000  |
| H | 1.490540000  | 1.573150000  | 10.309632000 |
| H | 1.706187000  | -0.160921000 | 8.579526000  |
| H | 1.791551000  | 1.935024000  | 7.922124000  |
| H | -0.097031000 | 2.362408000  | 10.293357000 |
| H | -0.497533000 | 0.123283000  | 10.337885000 |
| H | -0.670559000 | -1.993152000 | 8.006458000  |
| H | -0.724957000 | 3.228431000  | 7.469888000  |
| H | -0.805696000 | 2.219901000  | 5.476050000  |
| H | -1.169375000 | -0.815552000 | 6.145153000  |
| H | -3.276843000 | 4.796246000  | 10.016936000 |
| H | -4.100710000 | 3.864020000  | 5.526045000  |
| H | -4.596516000 | 3.691851000  | 10.389012000 |
| H | -4.749306000 | 4.819818000  | 9.037289000  |
| H | -5.164472000 | 4.345187000  | 6.856058000  |
| H | -5.373984000 | 2.776852000  | 6.068734000  |
| N | -0.124465000 | 0.454746000  | 9.452794000  |
| N | -0.223014000 | 2.344466000  | 7.461412000  |

|    |              |              |             |
|----|--------------|--------------|-------------|
| N  | -0.557049000 | -0.309420000 | 6.777860000 |
| O  | -2.494122000 | 2.336199000  | 9.255883000 |
| O  | -2.716210000 | -0.554696000 | 8.582712000 |
| O  | -2.922170000 | 1.843077000  | 6.857444000 |
| Re | -1.885332000 | 0.854887000  | 8.171232000 |

**(j) [Tc(tacn)O<sub>3</sub>]<sup>+</sup>**

|   |             |              |              |
|---|-------------|--------------|--------------|
| C | 2.060186000 | 1.504451000  | 13.010099000 |
| C | 2.987228000 | 3.793134000  | 13.453008000 |
| C | 3.276103000 | 0.689522000  | 13.452956000 |
| C | 4.300481000 | 4.439568000  | 13.009576000 |
| C | 5.721266000 | 1.030363000  | 13.012457000 |
| C | 5.822682000 | 2.492810000  | 13.450299000 |
| H | 1.383341000 | 1.650922000  | 13.854868000 |
| H | 1.518894000 | 0.984254000  | 12.222902000 |
| H | 1.741674000 | 3.205259000  | 11.910633000 |
| H | 2.234971000 | 4.564961000  | 13.611853000 |
| H | 2.983311000 | -0.347922000 | 13.612044000 |
| H | 3.114232000 | 3.277835000  | 14.403364000 |
| H | 3.658709000 | 1.056108000  | 14.403811000 |
| H | 4.119585000 | 5.166723000  | 12.221051000 |
| H | 4.407635000 | -0.094128000 | 11.910875000 |
| H | 4.766505000 | 4.953498000  | 13.852920000 |
| H | 5.318843000 | 2.644621000  | 14.403075000 |
| H | 5.929268000 | 0.373792000  | 13.860130000 |
| H | 5.932442000 | 3.865523000  | 11.908332000 |
| H | 6.442971000 | 0.816194000  | 12.227409000 |
| H | 6.868752000 | 2.756390000  | 13.602394000 |
| N | 2.506501000 | 2.802307000  | 12.444853000 |
| N | 4.375360000 | 0.769356000  | 12.445414000 |
| N | 5.201976000 | 3.404760000  | 12.443769000 |
| O | 2.832494000 | 1.294944000  | 10.146329000 |
| O | 3.733060000 | 3.887545000  | 10.144099000 |
| O | 5.527936000 | 1.809321000  | 10.144977000 |

**(k) [Tc(tacn)O<sub>3</sub>]<sup>+</sup> + dimethylketene product**

|   |              |              |             |
|---|--------------|--------------|-------------|
| C | 0.364438000  | 2.176841000  | 5.884360000 |
| C | 1.448235000  | 1.521093000  | 9.373158000 |
| C | 1.806601000  | 1.825110000  | 7.915354000 |
| C | -0.352747000 | -0.181613000 | 8.997252000 |
| C | -0.434896000 | 0.885710000  | 6.046430000 |
| C | -1.558043000 | -0.123391000 | 8.064373000 |
| C | -3.328161000 | 4.220651000  | 7.416319000 |
| C | -3.412565000 | 5.662844000  | 7.928814000 |
| C | -3.831349000 | 3.261693000  | 8.512853000 |
| C | -4.132689000 | 4.029803000  | 6.132767000 |
| H | 0.220347000  | 0.046926000  | 6.274451000 |
| H | 0.517268000  | -0.584881000 | 8.481038000 |
| H | 1.153843000  | 3.618049000  | 7.101899000 |

|    |              |              |              |
|----|--------------|--------------|--------------|
| H  | 1.236909000  | 2.011156000  | 5.248784000  |
| H  | 1.631698000  | 2.391285000  | 9.998485000  |
| H  | 1.910827000  | 0.903565000  | 7.346915000  |
| H  | 2.078063000  | 0.704361000  | 9.734097000  |
| H  | 2.775075000  | 2.322813000  | 7.883327000  |
| H  | -0.241127000 | 1.227083000  | 10.499824000 |
| H  | -0.252315000 | 2.953032000  | 5.435178000  |
| H  | -0.561991000 | -0.852548000 | 9.829122000  |
| H  | -0.932806000 | 0.643662000  | 5.107297000  |
| H  | -1.654601000 | -1.065539000 | 7.519301000  |
| H  | -2.333811000 | 1.241043000  | 6.754509000  |
| H  | -2.470047000 | 0.036646000  | 8.636540000  |
| H  | -2.812288000 | 5.798496000  | 8.828816000  |
| H  | -3.046669000 | 6.342841000  | 7.159916000  |
| H  | -3.766499000 | 4.711240000  | 5.365342000  |
| H  | -4.051143000 | 3.007717000  | 5.757707000  |
| H  | -4.446653000 | 5.912232000  | 8.161814000  |
| H  | -5.185134000 | 4.235417000  | 6.319824000  |
| N  | 0.774252000  | 2.684122000  | 7.227561000  |
| N  | -0.001843000 | 1.181748000  | 9.513905000  |
| N  | -1.422838000 | 1.034758000  | 7.149285000  |
| O  | -0.246386000 | 3.965048000  | 9.545731000  |
| O  | -1.945863000 | 3.896443000  | 7.149399000  |
| O  | -2.831031000 | 2.518188000  | 9.067217000  |
| O  | -4.970528000 | 3.147892000  | 8.856003000  |
| Tc | -1.015250000 | 2.933910000  | 8.500589000  |

**(I) [Tc(tacn)O<sub>3</sub>]<sup>+</sup> + 2-butyne product**

|   |              |              |              |
|---|--------------|--------------|--------------|
| C | 0.084206000  | -1.305328000 | 7.677396000  |
| C | 0.104131000  | 1.987816000  | 6.045269000  |
| C | 0.422045000  | 0.497051000  | 5.962383000  |
| C | 0.595899000  | 1.753609000  | 9.711396000  |
| C | 0.742816000  | -0.615238000 | 8.874940000  |
| C | 0.952411000  | 2.417379000  | 8.380584000  |
| C | -3.471286000 | 3.123456000  | 8.679567000  |
| C | -3.700781000 | 2.859808000  | 7.383127000  |
| C | -4.070851000 | 4.147269000  | 9.579916000  |
| C | -4.637472000 | 3.506038000  | 6.422619000  |
| H | 0.406882000  | 0.174128000  | 4.921907000  |
| H | 0.830291000  | -1.902783000 | 7.147485000  |
| H | 0.935517000  | 2.571134000  | 5.641203000  |
| H | 0.963430000  | -1.360050000 | 9.638944000  |
| H | 1.255506000  | 3.449447000  | 8.557740000  |
| H | 1.424144000  | 0.294506000  | 6.337610000  |
| H | 1.496306000  | 1.587815000  | 10.307136000 |
| H | 1.694291000  | -0.172563000 | 8.587276000  |
| H | 1.802124000  | 1.920260000  | 7.915737000  |
| H | -0.086041000 | 2.383658000  | 10.279548000 |
| H | -0.509153000 | 0.149247000  | 10.340589000 |
| H | -0.698061000 | 3.242585000  | 7.452231000  |
| H | -0.708022000 | -1.970358000 | 8.013805000  |

|    |              |              |              |
|----|--------------|--------------|--------------|
| H  | -0.789055000 | 2.212694000  | 5.464824000  |
| H  | -1.168438000 | -0.806778000 | 6.131762000  |
| H  | -3.295489000 | 4.780460000  | 10.018074000 |
| H  | -4.098937000 | 3.884051000  | 5.550216000  |
| H  | -4.603298000 | 3.666706000  | 10.404102000 |
| H  | -4.773474000 | 4.783090000  | 9.045445000  |
| H  | -5.172212000 | 4.333174000  | 6.884710000  |
| H  | -5.371835000 | 2.781668000  | 6.062677000  |
| N  | -0.123204000 | 0.470581000  | 9.457606000  |
| N  | -0.204412000 | 2.354878000  | 7.447635000  |
| N  | -0.553194000 | -0.306547000 | 6.765971000  |
| O  | -2.500255000 | 2.326567000  | 9.260583000  |
| O  | -2.710473000 | -0.512479000 | 8.559151000  |
| O  | -2.919455000 | 1.851307000  | 6.850691000  |
| Tc | -1.877223000 | 0.876517000  | 8.159263000  |

**(m) [Tc(tacn)O<sub>3</sub>]<sup>+</sup> + norbornene product**

|   |              |              |              |
|---|--------------|--------------|--------------|
| C | 0.008558000  | -1.282494000 | 7.874242000  |
| C | 0.136734000  | 1.864095000  | 5.993222000  |
| C | 0.386048000  | 0.358720000  | 6.020450000  |
| C | 0.625330000  | 1.904107000  | 9.665046000  |
| C | 0.688953000  | -0.521846000 | 9.017363000  |
| C | 1.004833000  | 2.439748000  | 8.284871000  |
| C | -3.415911000 | 3.398286000  | 8.549225000  |
| C | -3.699566000 | 2.931606000  | 7.084688000  |
| C | -4.790710000 | 3.262394000  | 9.235258000  |
| C | -5.204039000 | 2.593032000  | 7.111083000  |
| C | -5.387940000 | 2.026200000  | 8.532915000  |
| C | -5.680448000 | 4.396994000  | 8.677521000  |
| C | -5.960969000 | 3.938673000  | 7.210784000  |
| H | 0.344283000  | -0.039681000 | 5.007318000  |
| H | 0.742691000  | -1.930267000 | 7.387883000  |
| H | 0.888856000  | -1.215820000 | 9.833456000  |
| H | 0.996337000  | 2.375365000  | 5.551300000  |
| H | 1.349402000  | 3.470507000  | 8.375312000  |
| H | 1.383440000  | 0.140944000  | 6.400185000  |
| H | 1.519910000  | 1.761433000  | 10.276062000 |
| H | 1.654239000  | -0.135357000 | 8.696480000  |
| H | 1.833986000  | 1.873437000  | 7.863787000  |
| H | -0.035729000 | 2.603869000  | 10.173258000 |
| H | -0.523991000 | 0.392529000  | 10.425323000 |
| H | -0.613640000 | 3.246329000  | 7.301778000  |
| H | -0.743437000 | 2.085388000  | 5.392660000  |
| H | -0.793650000 | -1.905948000 | 8.260718000  |
| H | -1.242248000 | -0.875209000 | 6.300777000  |
| H | -3.041533000 | 4.423921000  | 8.609649000  |
| H | -3.479116000 | 3.700047000  | 6.338886000  |
| H | -4.717315000 | 3.234164000  | 10.320349000 |
| H | -4.847441000 | 1.100560000  | 8.719012000  |
| H | -5.193427000 | 5.371605000  | 8.730046000  |
| H | -5.507873000 | 1.962407000  | 6.278314000  |

|    |              |              |             |
|----|--------------|--------------|-------------|
| H  | -5.619243000 | 4.662653000  | 6.469724000 |
| H  | -6.435590000 | 1.865632000  | 8.787879000 |
| H  | -6.602851000 | 4.466065000  | 9.252811000 |
| H  | -7.025712000 | 3.783138000  | 7.042351000 |
| N  | -0.136045000 | 0.632418000  | 9.518385000 |
| N  | -0.155804000 | 2.344102000  | 7.361360000 |
| N  | -0.611493000 | -0.342199000 | 6.891230000 |
| O  | -2.411957000 | 2.553465000  | 9.127903000 |
| O  | -2.672694000 | -0.385458000 | 8.781242000 |
| O  | -2.866983000 | 1.803347000  | 6.778043000 |
| Tc | -1.908511000 | 0.974955000  | 8.197754000 |

**(n) [Tc(tacn)O<sub>3</sub>]<sup>+</sup> + propene product**

|    |              |              |              |
|----|--------------|--------------|--------------|
| C  | 0.213225000  | 0.440642000  | 5.961818000  |
| C  | 0.687512000  | -0.544071000 | 8.898515000  |
| C  | 0.707586000  | 1.859130000  | 9.634180000  |
| C  | 1.010530000  | 2.438946000  | 8.254152000  |
| C  | -0.003016000 | 1.951703000  | 6.004046000  |
| C  | -0.078168000 | -1.257459000 | 7.779083000  |
| C  | -3.614054000 | 3.231588000  | 8.810623000  |
| C  | -3.660900000 | 3.047602000  | 7.287332000  |
| C  | -4.820248000 | 2.655179000  | 9.539895000  |
| H  | 0.092812000  | 2.549926000  | 10.208511000 |
| H  | 0.099948000  | 0.084125000  | 4.938725000  |
| H  | 0.611465000  | -1.900844000 | 7.226998000  |
| H  | 0.842794000  | 2.459194000  | 5.532618000  |
| H  | 0.927177000  | -1.266629000 | 9.677868000  |
| H  | 1.227463000  | 0.189230000  | 6.268513000  |
| H  | 1.374602000  | 3.461247000  | 8.359822000  |
| H  | 1.635459000  | 1.679708000  | 10.182472000 |
| H  | 1.636281000  | -0.161632000 | 8.528398000  |
| H  | 1.803698000  | 1.878117000  | 7.762292000  |
| H  | -0.419793000 | 0.340434000  | 10.408710000 |
| H  | -0.647911000 | 3.303314000  | 7.400718000  |
| H  | -0.864515000 | -1.880990000 | 8.196629000  |
| H  | -0.908531000 | 2.212922000  | 5.460506000  |
| H  | -1.414191000 | -0.782446000 | 6.296214000  |
| H  | -3.189475000 | 3.889271000  | 6.769022000  |
| H  | -3.511725000 | 4.291575000  | 9.057234000  |
| H  | -4.683304000 | 2.737184000  | 10.617623000 |
| H  | -4.685771000 | 2.961181000  | 6.921387000  |
| H  | -4.972871000 | 1.604558000  | 9.287165000  |
| H  | -5.720458000 | 3.207981000  | 9.267011000  |
| N  | -0.083870000 | 0.606302000  | 9.488743000  |
| N  | -0.206345000 | 2.391396000  | 7.402518000  |
| N  | -0.742500000 | -0.277766000 | 6.865098000  |
| O  | -2.399711000 | 2.586238000  | 9.264302000  |
| O  | -2.674275000 | -0.326499000 | 8.944503000  |
| O  | -2.955178000 | 1.849368000  | 6.931094000  |
| Tc | -1.930505000 | 1.013139000  | 8.297344000  |



**(o) [Re(tacn)O<sub>3</sub>]<sup>+</sup> + dimethylketene transition state**

|    |              |              |              |
|----|--------------|--------------|--------------|
| C  | 0.643665000  | 2.296344000  | 5.969782000  |
| C  | 1.439923000  | 1.270946000  | 9.436947000  |
| C  | 1.924160000  | 1.689374000  | 8.044265000  |
| C  | -0.289843000 | 1.084390000  | 5.953715000  |
| C  | -0.445877000 | -0.264562000 | 8.800512000  |
| C  | -1.581412000 | -0.037844000 | 7.801860000  |
| C  | -3.699884000 | 5.924945000  | 7.401468000  |
| C  | -3.740879000 | 4.432123000  | 7.594582000  |
| C  | -3.922792000 | 3.970311000  | 8.912582000  |
| C  | -4.233761000 | 3.577369000  | 6.458456000  |
| H  | 0.149414000  | 3.167061000  | 5.533496000  |
| H  | 0.269957000  | 0.160857000  | 6.112190000  |
| H  | 0.423514000  | -0.705214000 | 8.307669000  |
| H  | 1.407033000  | 3.575156000  | 7.370013000  |
| H  | 1.545260000  | 2.082748000  | 5.382087000  |
| H  | 1.626027000  | 2.067690000  | 10.158620000 |
| H  | 1.993317000  | 0.380519000  | 9.761241000  |
| H  | 2.043341000  | 0.817583000  | 7.398189000  |
| H  | 2.915492000  | 2.143729000  | 8.133303000  |
| H  | -0.339187000 | 1.014425000  | 10.413960000 |
| H  | -0.759170000 | 0.994690000  | 4.969134000  |
| H  | -0.767131000 | -0.982295000 | 9.561015000  |
| H  | -1.686844000 | -0.912720000 | 7.148148000  |
| H  | -2.205767000 | 1.484705000  | 6.588276000  |
| H  | -2.525418000 | 0.108845000  | 8.330778000  |
| H  | -3.180719000 | 6.169765000  | 6.470087000  |
| H  | -3.192811000 | 6.434017000  | 8.223254000  |
| H  | -3.604116000 | 3.707694000  | 5.570540000  |
| H  | -4.287490000 | 2.516712000  | 6.717401000  |
| H  | -4.722874000 | 6.322426000  | 7.337081000  |
| H  | -5.251577000 | 3.883707000  | 6.179610000  |
| N  | 0.977387000  | 2.651969000  | 7.375781000  |
| N  | -0.034058000 | 1.024371000  | 9.442342000  |
| N  | -1.330615000 | 1.203673000  | 7.022627000  |
| O  | -0.139290000 | 3.863318000  | 9.741802000  |
| O  | -1.643577000 | 4.092639000  | 7.367283000  |
| O  | -2.658492000 | 2.704366000  | 9.185413000  |
| O  | -4.542646000 | 4.091702000  | 9.909330000  |
| Re | -0.981821000 | 2.968667000  | 8.561171000  |

**(p) [Re(tacn)O<sub>3</sub>]<sup>+</sup> + 2-butyne transition state**

|   |              |              |             |
|---|--------------|--------------|-------------|
| C | 0.042013000  | 2.081040000  | 6.041788000 |
| C | 0.322953000  | 0.580841000  | 5.968688000 |
| C | 0.511630000  | 1.829679000  | 9.703470000 |
| C | 0.602297000  | -0.538285000 | 8.872950000 |
| C | 0.867646000  | 2.502922000  | 8.377432000 |
| C | -0.074514000 | -1.212812000 | 7.677992000 |
| C | -3.939548000 | 3.598997000  | 8.498832000 |
| C | -4.137884000 | 3.312576000  | 7.305431000 |

|    |              |              |              |
|----|--------------|--------------|--------------|
| C  | -4.216020000 | 4.348421000  | 9.727848000  |
| C  | -4.826121000 | 3.477131000  | 6.021406000  |
| H  | 0.304566000  | 0.252986000  | 4.929972000  |
| H  | 0.651899000  | -1.831767000 | 7.146428000  |
| H  | 0.801724000  | -1.283136000 | 9.642351000  |
| H  | 0.900649000  | 2.642235000  | 5.666167000  |
| H  | 1.175301000  | 3.532372000  | 8.558658000  |
| H  | 1.317866000  | 0.355930000  | 6.349710000  |
| H  | 1.416936000  | 1.638939000  | 10.283723000 |
| H  | 1.565709000  | -0.122418000 | 8.584142000  |
| H  | 1.712319000  | 2.003303000  | 7.906321000  |
| H  | -0.148647000 | 2.467561000  | 10.287495000 |
| H  | -0.656957000 | 0.259676000  | 10.307029000 |
| H  | -0.758348000 | 3.359015000  | 7.430310000  |
| H  | -0.827211000 | 2.331161000  | 5.437370000  |
| H  | -0.889796000 | -1.848965000 | 8.014662000  |
| H  | -1.316812000 | -0.661513000 | 6.144626000  |
| H  | -3.318397000 | 4.845741000  | 10.098695000 |
| H  | -4.119859000 | 3.706186000  | 5.221742000  |
| H  | -4.573697000 | 3.681362000  | 10.513455000 |
| H  | -4.979348000 | 5.106439000  | 9.543029000  |
| H  | -5.352505000 | 2.562159000  | 5.745768000  |
| H  | -5.552174000 | 4.289688000  | 6.084128000  |
| N  | -0.236732000 | 0.571373000  | 9.436413000  |
| N  | -0.289656000 | 2.457943000  | 7.438635000  |
| N  | -0.674594000 | -0.189418000 | 6.773894000  |
| O  | -2.548850000 | 2.376684000  | 9.226329000  |
| O  | -2.847750000 | -0.359648000 | 8.589901000  |
| O  | -2.950715000 | 1.815335000  | 6.791813000  |
| Re | -2.059090000 | 1.077809000  | 8.130827000  |

**(q) [Re(tacn)O<sub>3</sub>]<sup>+</sup> + norbornene transition state**

|   |              |              |             |
|---|--------------|--------------|-------------|
| C | 0.097725000  | 1.901964000  | 5.986076000 |
| C | 0.301680000  | 0.388672000  | 6.037256000 |
| C | 0.567213000  | -0.493399000 | 9.030093000 |
| C | 0.611608000  | 1.938021000  | 9.651381000 |
| C | 0.985130000  | 2.469739000  | 8.267703000 |
| C | -0.154825000 | -1.229544000 | 7.899021000 |
| C | -3.799906000 | 3.847158000  | 8.418503000 |
| C | -4.040083000 | 3.429965000  | 7.095097000 |
| C | -5.072218000 | 3.570914000  | 9.191034000 |
| C | -5.462238000 | 2.908747000  | 7.062889000 |
| C | -5.595162000 | 2.306830000  | 8.477178000 |
| C | -6.095334000 | 4.635319000  | 8.672914000 |
| C | -6.363428000 | 4.178278000  | 7.205698000 |
| H | 0.249987000  | -0.023218000 | 5.030254000 |
| H | 0.536460000  | -1.923503000 | 7.415089000 |
| H | 0.732673000  | -1.181930000 | 9.857889000 |
| H | 0.976673000  | 2.384067000  | 5.551995000 |
| H | 1.290521000  | 0.146064000  | 6.423466000 |
| H | 1.356567000  | 3.490690000  | 8.352980000 |

|    |              |              |              |
|----|--------------|--------------|--------------|
| H  | 1.513557000  | 1.752318000  | 10.238795000 |
| H  | 1.549647000  | -0.157426000 | 8.703612000  |
| H  | 1.790667000  | 1.880507000  | 7.833106000  |
| H  | -0.007231000 | 2.659545000  | 10.181121000 |
| H  | -0.600072000 | 3.336134000  | 7.270994000  |
| H  | -0.627622000 | 0.491653000  | 10.402654000 |
| H  | -0.769297000 | 2.143370000  | 5.374956000  |
| H  | -0.994101000 | -1.796993000 | 8.294015000  |
| H  | -1.393584000 | -0.749787000 | 6.338746000  |
| H  | -3.171212000 | 4.690744000  | 8.662508000  |
| H  | -3.609932000 | 3.928582000  | 6.238697000  |
| H  | -4.965541000 | 3.534539000  | 10.271793000 |
| H  | -4.991282000 | 1.418621000  | 8.642643000  |
| H  | -5.703979000 | 5.650282000  | 8.736843000  |
| H  | -5.707002000 | 2.272218000  | 6.217006000  |
| H  | -6.117558000 | 4.944410000  | 6.470841000  |
| H  | -6.628632000 | 2.079817000  | 8.737551000  |
| H  | -7.003038000 | 4.595327000  | 9.274951000  |
| H  | -7.408292000 | 3.905625000  | 7.057879000  |
| N  | -0.188768000 | 2.411966000  | 7.350003000  |
| N  | -0.204697000 | 0.703571000  | 9.503958000  |
| N  | -0.719010000 | -0.258764000 | 6.917439000  |
| O  | -2.432464000 | 2.597199000  | 9.173561000  |
| O  | -2.849042000 | -0.175393000 | 8.781013000  |
| O  | -2.900437000 | 1.828717000  | 6.776519000  |
| Re | -2.017909000 | 1.184570000  | 8.179024000  |

**(r)[Re(tacn)O<sub>3</sub>]<sup>+</sup> + propene transition state**

|   |              |              |              |
|---|--------------|--------------|--------------|
| C | 0.422333000  | 2.209980000  | 5.917057000  |
| C | 1.495726000  | 1.430729000  | 9.363267000  |
| C | 1.860750000  | 1.782705000  | 7.922445000  |
| C | -0.317629000 | -0.239255000 | 8.921397000  |
| C | -0.434055000 | 0.950221000  | 6.017860000  |
| C | -1.525922000 | -0.141752000 | 7.994547000  |
| C | -3.618132000 | 5.830404000  | 7.796997000  |
| C | -3.754090000 | 4.352787000  | 7.561769000  |
| C | -4.182819000 | 3.475970000  | 8.570096000  |
| H | 0.189107000  | 0.071631000  | 6.186371000  |
| H | 0.545299000  | -0.641964000 | 8.389873000  |
| H | 1.198254000  | 3.595007000  | 7.197097000  |
| H | 1.301819000  | 2.017915000  | 5.292645000  |
| H | 1.683921000  | 2.276338000  | 10.025294000 |
| H | 1.972553000  | 0.879678000  | 7.322148000  |
| H | 2.112485000  | 0.590661000  | 9.702370000  |
| H | 2.826778000  | 2.292993000  | 7.906746000  |
| H | -0.143525000 | 3.027274000  | 5.467621000  |
| H | -0.197435000 | 1.118067000  | 10.461062000 |
| H | -0.535907000 | -0.929810000 | 9.739221000  |
| H | -0.962536000 | 0.786873000  | 5.075442000  |
| H | -1.605519000 | -1.051047000 | 7.388130000  |
| H | -2.328729000 | 1.259080000  | 6.748695000  |

|    |              |              |             |
|----|--------------|--------------|-------------|
| H  | -2.444842000 | -0.037661000 | 8.572954000 |
| H  | -2.936276000 | 6.289711000  | 7.075224000 |
| H  | -3.263411000 | 6.049530000  | 8.808752000 |
| H  | -3.961813000 | 4.057809000  | 6.535624000 |
| H  | -4.422209000 | 3.874447000  | 9.551893000 |
| H  | -4.596169000 | 6.314484000  | 7.674000000 |
| H  | -4.706767000 | 2.567701000  | 8.291927000 |
| N  | 0.045116000  | 1.104972000  | 9.473361000 |
| N  | 0.819445000  | 2.654379000  | 7.279098000 |
| N  | -1.411603000 | 1.067522000  | 7.141946000 |
| O  | -0.251686000 | 3.947188000  | 9.648908000 |
| O  | -1.821098000 | 3.925387000  | 7.313774000 |
| O  | -2.635202000 | 2.497773000  | 9.271127000 |
| Re | -1.073007000 | 2.927992000  | 8.560330000 |

**(s) [Tc(tacn)O<sub>3</sub>]<sup>+</sup> + dimethylketene transition state**

|   |              |              |              |
|---|--------------|--------------|--------------|
| C | 0.459642000  | 1.816908000  | 5.786069000  |
| C | 1.538512000  | 1.676771000  | 9.327122000  |
| C | 1.902219000  | 1.766217000  | 7.841784000  |
| C | -0.264727000 | -0.066965000 | 9.201935000  |
| C | -0.391853000 | 0.584905000  | 6.107639000  |
| C | -1.472983000 | -0.140531000 | 8.265521000  |
| C | -3.662691000 | 5.484390000  | 8.449273000  |
| C | -3.925649000 | 4.397139000  | 7.448215000  |
| C | -4.172744000 | 3.087083000  | 7.834420000  |
| C | -4.341250000 | 4.786030000  | 6.051893000  |
| H | 0.237891000  | -0.251215000 | 6.417550000  |
| H | 0.601253000  | -0.563805000 | 8.758477000  |
| H | 1.222048000  | 3.418501000  | 6.802802000  |
| H | 1.331601000  | 1.523352000  | 5.187635000  |
| H | 1.710570000  | 2.636898000  | 9.817015000  |
| H | 2.024444000  | 0.768588000  | 7.415650000  |
| H | 2.183440000  | 0.931203000  | 9.810895000  |
| H | 2.871723000  | 2.263972000  | 7.739855000  |
| H | -0.120267000 | 2.540568000  | 5.208938000  |
| H | -0.150596000 | 1.554277000  | 10.472347000 |
| H | -0.490846000 | -0.608809000 | 10.125478000 |
| H | -0.914370000 | 0.258552000  | 5.202734000  |
| H | -1.560628000 | -1.152531000 | 7.850239000  |
| H | -2.291022000 | 1.003888000  | 6.791736000  |
| H | -2.390205000 | 0.081298000  | 8.813870000  |
| H | -2.854236000 | 6.139074000  | 8.105636000  |
| H | -3.409817000 | 5.103624000  | 9.437964000  |
| H | -3.646762000 | 5.528381000  | 5.646980000  |
| H | -4.383325000 | 3.936006000  | 5.369608000  |
| H | -4.561259000 | 6.109015000  | 8.542364000  |
| H | -5.339715000 | 5.244082000  | 6.086984000  |
| N | 0.096199000  | 1.350936000  | 9.506133000  |
| N | 0.861868000  | 2.497544000  | 7.044632000  |
| N | -1.365483000 | 0.884151000  | 7.195897000  |
| O | -0.256740000 | 4.169216000  | 9.160071000  |

|    |              |             |             |
|----|--------------|-------------|-------------|
| O  | -1.803431000 | 3.783580000 | 6.883575000 |
| O  | -2.669670000 | 2.662623000 | 8.946740000 |
| O  | -4.823839000 | 2.105586000 | 7.751590000 |
| Tc | -1.063976000 | 2.992505000 | 8.252476000 |

**(t) [Tc(tacn)O<sub>3</sub>]<sup>+</sup> + 2-butyne transition state**

|    |              |              |              |
|----|--------------|--------------|--------------|
| C  | 0.039351000  | 2.105821000  | 6.058894000  |
| C  | 0.317038000  | 0.605137000  | 5.964520000  |
| C  | 0.515246000  | 1.801286000  | 9.712730000  |
| C  | 0.596487000  | -0.553582000 | 8.851874000  |
| C  | 0.866785000  | 2.494294000  | 8.395014000  |
| C  | -0.085380000 | -1.208551000 | 7.648015000  |
| C  | -4.008726000 | 3.660973000  | 8.494933000  |
| C  | -4.198736000 | 3.387351000  | 7.306260000  |
| C  | -4.218272000 | 4.345016000  | 9.771483000  |
| C  | -4.816339000 | 3.477343000  | 5.982476000  |
| H  | 0.299363000  | 0.294969000  | 4.919951000  |
| H  | 0.638346000  | -1.827784000 | 7.112054000  |
| H  | 0.796770000  | -1.313176000 | 9.606985000  |
| H  | 0.899713000  | 2.667967000  | 5.687165000  |
| H  | 1.178453000  | 3.519783000  | 8.593037000  |
| H  | 1.312857000  | 0.374950000  | 6.340389000  |
| H  | 1.424399000  | 1.607802000  | 10.287032000 |
| H  | 1.561277000  | -0.138830000 | 8.565359000  |
| H  | 1.710198000  | 2.000267000  | 7.915542000  |
| H  | -0.141487000 | 2.432439000  | 10.308245000 |
| H  | -0.655940000 | 0.226879000  | 10.300036000 |
| H  | -0.758444000 | 3.367624000  | 7.463590000  |
| H  | -0.828184000 | 2.366014000  | 5.456187000  |
| H  | -0.903139000 | -1.845104000 | 7.978099000  |
| H  | -1.328130000 | -0.631412000 | 6.124360000  |
| H  | -3.301438000 | 4.817369000  | 10.125852000 |
| H  | -4.073482000 | 3.678037000  | 5.209540000  |
| H  | -4.552734000 | 3.644615000  | 10.537457000 |
| H  | -4.980843000 | 5.117603000  | 9.652862000  |
| H  | -5.323458000 | 2.546671000  | 5.725638000  |
| H  | -5.550329000 | 4.285841000  | 5.972964000  |
| N  | -0.231462000 | 0.548505000  | 9.435771000  |
| N  | -0.289127000 | 2.467743000  | 7.457496000  |
| N  | -0.677978000 | -0.175446000 | 6.756609000  |
| O  | -2.518974000 | 2.348795000  | 9.241747000  |
| O  | -2.822441000 | -0.354206000 | 8.587404000  |
| O  | -2.922410000 | 1.789723000  | 6.795218000  |
| Tc | -2.070546000 | 1.084819000  | 8.136641000  |

**(u) [Tc(tacn)O<sub>3</sub>]<sup>+</sup> + norbornene transition state**

|    |              |              |              |
|----|--------------|--------------|--------------|
| C  | 0.119254000  | 1.870829000  | 5.972894000  |
| C  | 0.342720000  | 0.359747000  | 6.034912000  |
| C  | 0.607122000  | -0.495482000 | 9.023615000  |
| C  | 0.610297000  | 1.934009000  | 9.637309000  |
| C  | 0.977896000  | 2.473970000  | 8.253967000  |
| C  | -0.109806000 | -1.250023000 | 7.902181000  |
| C  | -3.847270000 | 3.909880000  | 8.377469000  |
| C  | -4.119282000 | 3.486229000  | 7.083466000  |
| C  | -5.084743000 | 3.630807000  | 9.199060000  |
| C  | -5.528875000 | 2.939552000  | 7.090391000  |
| C  | -5.616367000 | 2.353597000  | 8.515464000  |
| C  | -6.136442000 | 4.680542000  | 8.699038000  |
| C  | -6.444662000 | 4.202345000  | 7.248160000  |
| H  | 0.306817000  | -0.055544000 | 5.028280000  |
| H  | 0.584966000  | -1.951232000 | 7.432828000  |
| H  | 0.795317000  | -1.177417000 | 9.852576000  |
| H  | 0.995655000  | 2.359007000  | 5.539247000  |
| H  | 1.325557000  | 3.503211000  | 8.344106000  |
| H  | 1.332848000  | 0.134637000  | 6.428666000  |
| H  | 1.516275000  | 1.770429000  | 10.226165000 |
| H  | 1.580254000  | -0.144085000 | 8.685312000  |
| H  | 1.801639000  | 1.905029000  | 7.826141000  |
| H  | -0.021020000 | 2.645698000  | 10.165559000 |
| H  | -0.612283000 | 3.306049000  | 7.236029000  |
| H  | -0.612316000 | 0.471163000  | 10.385891000 |
| H  | -0.744322000 | 2.096268000  | 5.350688000  |
| H  | -0.947586000 | -1.814716000 | 8.304706000  |
| H  | -1.342592000 | -0.795721000 | 6.329763000  |
| H  | -3.141083000 | 4.685845000  | 8.630670000  |
| H  | -3.654116000 | 3.891548000  | 6.198174000  |
| H  | -4.943525000 | 3.609681000  | 10.275886000 |
| H  | -4.993309000 | 1.476982000  | 8.672292000  |
| H  | -5.752591000 | 5.699325000  | 8.738292000  |
| H  | -5.791069000 | 2.293801000  | 6.257423000  |
| H  | -6.235052000 | 4.961982000  | 6.496116000  |
| H  | -6.639147000 | 2.117776000  | 8.808264000  |
| H  | -7.023326000 | 4.638637000  | 9.331034000  |
| H  | -7.488538000 | 3.909147000  | 7.137993000  |
| N  | -0.179716000 | 0.686600000  | 9.493171000  |
| N  | -0.184158000 | 2.391312000  | 7.326258000  |
| N  | -0.672855000 | -0.297823000 | 6.907478000  |
| O  | -2.387743000 | 2.520071000  | 9.162022000  |
| O  | -2.803892000 | -0.214985000 | 8.747104000  |
| O  | -2.857286000 | 1.745262000  | 6.748577000  |
| Tc | -2.015433000 | 1.152250000  | 8.152108000  |

**(v) [Tc(tacn)O<sub>3</sub>]<sup>+</sup> + propene transition state**

|    |              |              |              |
|----|--------------|--------------|--------------|
| C  | 0.446606000  | 2.191660000  | 5.902826000  |
| C  | 1.483658000  | 1.443914000  | 9.375810000  |
| C  | 1.868099000  | 1.797415000  | 7.934738000  |
| C  | -0.309765000 | -0.255367000 | 8.926010000  |
| C  | -0.405322000 | 0.922267000  | 5.997732000  |
| C  | -1.507741000 | -0.171854000 | 7.976563000  |
| C  | -3.612214000 | 5.858463000  | 7.824345000  |
| C  | -3.808166000 | 4.391858000  | 7.584912000  |
| C  | -4.211740000 | 3.510512000  | 8.599025000  |
| H  | 0.223964000  | 0.046555000  | 6.168657000  |
| H  | 0.562921000  | -0.664560000 | 8.412209000  |
| H  | 1.187803000  | 3.598934000  | 7.186353000  |
| H  | 1.325445000  | 2.003602000  | 5.272565000  |
| H  | 1.642709000  | 2.302348000  | 10.030490000 |
| H  | 2.010776000  | 0.892094000  | 7.341471000  |
| H  | 2.124438000  | 0.625517000  | 9.729862000  |
| H  | 2.832978000  | 2.314215000  | 7.940989000  |
| H  | -0.128572000 | 3.002207000  | 5.450159000  |
| H  | -0.221990000 | 1.122212000  | 10.457438000 |
| H  | -0.541176000 | -0.950728000 | 9.738743000  |
| H  | -0.913543000 | 0.753303000  | 5.042901000  |
| H  | -1.580337000 | -1.096295000 | 7.388825000  |
| H  | -2.312184000 | 1.219306000  | 6.715388000  |
| H  | -2.431862000 | -0.060438000 | 8.547348000  |
| H  | -2.946625000 | 6.301020000  | 7.078521000  |
| H  | -3.214345000 | 6.061503000  | 8.822633000  |
| H  | -4.043024000 | 4.108300000  | 6.560836000  |
| H  | -4.399672000 | 3.898074000  | 9.596047000  |
| H  | -4.579665000 | 6.371673000  | 7.740367000  |
| H  | -4.771483000 | 2.618915000  | 8.336588000  |
| N  | 0.040641000  | 1.089369000  | 9.474864000  |
| N  | 0.831770000  | 2.648573000  | 7.262587000  |
| N  | -1.395548000 | 1.026676000  | 7.109435000  |
| O  | -0.283170000 | 3.939801000  | 9.602888000  |
| O  | -1.850728000 | 3.903812000  | 7.273182000  |
| O  | -2.662158000 | 2.492789000  | 9.235167000  |
| Tc | -1.107570000 | 2.928073000  | 8.528594000  |

## E. Selected PBE-D2 optimized coordinates (Å)

### (a) [Re(tacn)O<sub>3</sub>]<sup>+</sup> + dimethylketene transition state

|    |              |              |              |
|----|--------------|--------------|--------------|
| C  | 2.662041000  | 1.946266000  | 0.625058000  |
| C  | 2.905586000  | -0.569349000 | 0.680011000  |
| C  | 3.105551000  | 0.642217000  | 0.040631000  |
| C  | 4.061388000  | 0.665339000  | -1.120129000 |
| C  | -1.121788000 | 1.354322000  | 2.037119000  |
| C  | -1.556442000 | 2.356227000  | -0.226167000 |
| C  | -1.613228000 | 1.726414000  | -1.614459000 |
| C  | -2.264779000 | 0.345693000  | 2.003599000  |
| C  | -2.981240000 | -1.210927000 | 0.176390000  |
| C  | -3.114606000 | -0.160936000 | -0.924958000 |
| H  | 0.264241000  | 2.057253000  | 0.691764000  |
| H  | 2.060019000  | 1.802302000  | 1.533820000  |
| H  | 2.107193000  | 2.543168000  | -0.123087000 |
| H  | 3.545924000  | 2.544452000  | 0.911113000  |
| H  | 3.640164000  | 1.274385000  | -1.937001000 |
| H  | 4.269658000  | -0.342249000 | -1.505719000 |
| H  | 5.018640000  | 1.127304000  | -0.812825000 |
| H  | -0.271961000 | 0.953082000  | 2.607132000  |
| H  | -0.666302000 | 1.887255000  | -2.148100000 |
| H  | -1.209016000 | 3.395802000  | -0.292507000 |
| H  | -1.451211000 | 2.303656000  | 2.486525000  |
| H  | -1.637782000 | -0.179696000 | -2.382241000 |
| H  | -1.688371000 | -1.620632000 | 1.722569000  |
| H  | -2.445041000 | 2.144774000  | -2.200934000 |
| H  | -2.493955000 | -0.007182000 | 3.017618000  |
| H  | -2.549111000 | 2.371736000  | 0.243260000  |
| H  | -2.684651000 | -2.178561000 | -0.248079000 |
| H  | -3.177722000 | 0.804974000  | 1.600599000  |
| H  | -3.617365000 | 0.738151000  | -0.545153000 |
| H  | -3.728691000 | -0.555424000 | -1.744933000 |
| H  | -3.939051000 | -1.323395000 | 0.707822000  |
| N  | -0.632152000 | 1.561240000  | 0.645237000  |
| N  | -1.762321000 | 0.248332000  | -1.458235000 |
| N  | -1.893033000 | -0.812302000 | 1.125569000  |
| O  | 1.123351000  | 0.307290000  | -1.226222000 |
| O  | 1.184738000  | -0.574971000 | 1.129974000  |
| O  | 3.372260000  | -1.632293000 | 0.956378000  |
| O  | -0.286568000 | -2.092745000 | -0.767229000 |
| Re | -0.039709000 | -0.498025000 | -0.194339000 |

### (b) [Re(tacn)O<sub>3</sub>]<sup>+</sup> + 2-butyne transition state

|   |             |              |             |
|---|-------------|--------------|-------------|
| C | 3.004590000 | 0.634398000  | 0.238683000 |
| C | 3.006961000 | -0.626893000 | 0.263081000 |
| C | 3.660541000 | 1.937291000  | 0.397929000 |
| C | 3.668398000 | -1.919771000 | 0.471065000 |



|    |              |              |              |
|----|--------------|--------------|--------------|
| C  | -0.816187000 | -1.400038000 | 2.056327000  |
| C  | -1.228545000 | 1.071882000  | 2.188114000  |
| C  | -1.398742000 | 2.119731000  | 1.089648000  |
| C  | -2.029276000 | -1.741020000 | 1.195425000  |
| C  | -2.931355000 | -0.627317000 | -0.859685000 |
| C  | -3.027881000 | 0.776527000  | -0.267099000 |
| H  | 0.017663000  | -2.077876000 | 1.830008000  |
| H  | 0.599181000  | 0.097340000  | 2.063767000  |
| H  | 3.118676000  | 2.556999000  | 1.131404000  |
| H  | 3.134750000  | -2.509408000 | 1.234787000  |
| H  | 3.667437000  | 2.490791000  | -0.555514000 |
| H  | 3.668625000  | -2.512893000 | -0.458307000 |
| H  | 4.701191000  | 1.811607000  | 0.739234000  |
| H  | 4.711623000  | -1.776967000 | 0.797575000  |
| H  | -0.465040000 | 2.680239000  | 0.946703000  |
| H  | -0.798785000 | 1.531266000  | 3.088486000  |
| H  | -1.070068000 | -1.470296000 | 3.125658000  |
| H  | -1.603964000 | 2.116711000  | -0.953966000 |
| H  | -1.612629000 | -2.204161000 | -0.777673000 |
| H  | -2.198941000 | 0.641998000  | 2.472004000  |
| H  | -2.216289000 | 2.814552000  | 1.335713000  |
| H  | -2.253296000 | -2.814045000 | 1.256415000  |
| H  | -2.719579000 | -0.576892000 | -1.936013000 |
| H  | -2.918569000 | -1.200258000 | 1.547230000  |
| H  | -3.439005000 | 0.742209000  | 0.750454000  |
| H  | -3.703744000 | 1.395583000  | -0.871583000 |
| H  | -3.872018000 | -1.176210000 | -0.696007000 |
| N  | -0.350290000 | -0.033478000 | 1.697912000  |
| N  | -1.666758000 | 1.420074000  | -0.203845000 |
| N  | -1.778415000 | -1.350441000 | -0.234946000 |
| O  | 1.223493000  | -1.278715000 | -0.169781000 |
| O  | 1.226472000  | 1.257617000  | -0.239759000 |
| O  | -0.260386000 | -0.070345000 | -2.275378000 |
| Re | 0.038045000  | -0.019074000 | -0.587277000 |

**(c) [Re(tacn)O<sub>3</sub>]<sup>+</sup> + norbornene transition state**

|   |              |              |              |
|---|--------------|--------------|--------------|
| C | 1.773484000  | 1.915933000  | -1.479794000 |
| C | 2.147329000  | 0.976628000  | 2.077017000  |
| C | 2.231236000  | 2.040356000  | 0.984591000  |
| C | 2.755616000  | 0.789585000  | -1.785888000 |
| C | 3.172011000  | -1.370774000 | -0.593182000 |
| C | 3.409715000  | -0.767746000 | 0.790038000  |
| C | -2.438985000 | 0.904455000  | -0.727991000 |
| C | -2.439265000 | 0.926074000  | 0.695675000  |
| C | -3.245106000 | -1.193088000 | 0.015773000  |
| C | -3.426253000 | -0.176018000 | -1.133726000 |
| C | -3.426740000 | -0.141550000 | 1.133767000  |
| C | -4.838232000 | 0.401566000  | -0.791035000 |
| C | -4.838454000 | 0.425582000  | 0.773031000  |
| H | 0.424626000  | 2.323536000  | 0.017032000  |
| H | 0.903787000  | 1.858002000  | -2.147915000 |

|    |              |              |              |
|----|--------------|--------------|--------------|
| H  | 1.207694000  | 1.077384000  | 2.637069000  |
| H  | 1.878186000  | -1.057687000 | 2.156717000  |
| H  | 1.894770000  | -1.049662000 | -2.174487000 |
| H  | 2.030962000  | 3.034909000  | 1.405376000  |
| H  | 2.262677000  | 2.896284000  | -1.591767000 |
| H  | 2.722915000  | -2.368908000 | -0.505591000 |
| H  | 2.980164000  | 0.758411000  | -2.860261000 |
| H  | 3.002621000  | 1.056159000  | 2.765396000  |
| H  | 3.236408000  | 2.069062000  | 0.542559000  |
| H  | 3.705838000  | 0.948848000  | -1.257650000 |
| H  | 3.932759000  | -1.490277000 | 1.430176000  |
| H  | 4.044387000  | 0.125580000  | 0.720430000  |
| H  | 4.122687000  | -1.443035000 | -1.144382000 |
| H  | -2.262183000 | -1.682629000 | 0.023338000  |
| H  | -2.324189000 | 1.851026000  | 1.263647000  |
| H  | -2.324434000 | 1.812050000  | -1.323260000 |
| H  | -3.320513000 | -0.548131000 | -2.161364000 |
| H  | -3.321509000 | -0.482193000 | 2.172307000  |
| H  | -4.036832000 | -1.958898000 | 0.027330000  |
| H  | -4.992531000 | 1.397601000  | -1.233389000 |
| H  | -4.992584000 | 1.434783000  | 1.184540000  |
| H  | -5.620896000 | -0.269316000 | -1.178704000 |
| H  | -5.621374000 | -0.232858000 | 1.180955000  |
| N  | 1.249539000  | 1.727233000  | -0.099468000 |
| N  | 2.105047000  | -0.369661000 | 1.431017000  |
| N  | 2.186572000  | -0.528181000 | -1.341848000 |
| O  | 0.288484000  | -2.122227000 | 0.022363000  |
| O  | -0.730066000 | 0.192222000  | -1.288825000 |
| O  | -0.735130000 | 0.224564000  | 1.275979000  |
| Re | 0.347654000  | -0.408110000 | 0.003976000  |

**(d)[Re(tacn)O<sub>3</sub>]<sup>+</sup> + propene transition state**

|   |              |              |              |
|---|--------------|--------------|--------------|
| C | 1.296645000  | 0.236072000  | 2.369239000  |
| C | 1.337838000  | 2.234132000  | -0.741959000 |
| C | 1.515643000  | 1.578635000  | 1.675259000  |
| C | 2.340084000  | 1.214941000  | -1.274041000 |
| C | 2.601779000  | -1.222336000 | -0.770972000 |
| C | 2.683156000  | -1.084147000 | 0.748056000  |
| C | -2.869707000 | 1.192803000  | -0.805410000 |
| C | -3.116340000 | 0.689141000  | 0.504774000  |
| C | -4.004966000 | -0.512518000 | 0.686012000  |
| H | 0.299872000  | 0.201995000  | 2.829824000  |
| H | 0.547858000  | 2.417408000  | -1.482767000 |
| H | 1.004759000  | -1.711448000 | 1.790647000  |
| H | 1.276638000  | 2.403584000  | 2.359706000  |
| H | 1.517318000  | -0.378094000 | -2.302520000 |
| H | 1.843263000  | 3.181133000  | -0.495996000 |
| H | 2.068084000  | 0.061706000  | 3.134815000  |
| H | 2.139726000  | -2.179716000 | -1.045576000 |
| H | 2.565291000  | 1.698728000  | 1.374336000  |
| H | 2.687503000  | 1.504509000  | -2.274515000 |

|    |              |              |              |
|----|--------------|--------------|--------------|
| H  | 3.121998000  | -1.990556000 | 1.185351000  |
| H  | 3.223892000  | 1.163971000  | -0.623202000 |
| H  | 3.328914000  | -0.241140000 | 1.027126000  |
| H  | 3.609015000  | -1.161481000 | -1.212146000 |
| H  | -0.165989000 | 2.221661000  | 0.660321000  |
| H  | -2.699639000 | 2.265174000  | -0.923954000 |
| H  | -3.124583000 | 1.419689000  | 1.318395000  |
| H  | -3.392853000 | 0.714196000  | -1.638052000 |
| H  | -3.806627000 | -1.256889000 | -0.102180000 |
| H  | -3.837990000 | -0.983246000 | 1.666662000  |
| H  | -5.068425000 | -0.222457000 | 0.622208000  |
| N  | 0.661193000  | 1.655210000  | 0.450368000  |
| N  | 1.315579000  | -0.845411000 | 1.338126000  |
| N  | 1.713648000  | -0.150071000 | -1.322950000 |
| O  | -0.339280000 | -2.006341000 | -0.719886000 |
| O  | -1.198224000 | 0.647447000  | -1.352683000 |
| O  | -1.494279000 | -0.091280000 | 1.063973000  |
| Re | -0.258953000 | -0.374744000 | -0.205390000 |

**(e) [Tc(tacn)O<sub>3</sub>]<sup>+</sup> + dimethylketene transition state**

|   |              |              |              |
|---|--------------|--------------|--------------|
| C | 1.204640000  | 2.082380000  | -1.071158000 |
| C | 1.496085000  | 1.813790000  | 1.403765000  |
| C | 1.513034000  | 0.562250000  | 2.280998000  |
| C | 2.342972000  | 1.160114000  | -1.499662000 |
| C | 2.977704000  | -1.113976000 | -0.675475000 |
| C | 3.061681000  | -0.748168000 | 0.805794000  |
| C | -2.603415000 | 1.004943000  | -0.542840000 |
| C | -3.245491000 | -0.055193000 | 0.039433000  |
| C | -3.391577000 | -1.385467000 | -0.634393000 |
| C | -3.975811000 | 0.201791000  | 1.333212000  |
| H | 0.386233000  | 2.053745000  | -1.803045000 |
| H | 0.546096000  | 0.436413000  | 2.787436000  |
| H | 1.129442000  | 2.672891000  | 1.982493000  |
| H | 1.507787000  | -1.471729000 | 1.975429000  |
| H | 1.569787000  | 3.117401000  | -0.971200000 |
| H | 1.745868000  | -0.668844000 | -2.265340000 |
| H | 2.315306000  | 0.629358000  | 3.032802000  |
| H | 2.509405000  | 2.062449000  | 1.059437000  |
| H | 2.620742000  | 1.361808000  | -2.543221000 |
| H | 2.659580000  | -2.158177000 | -0.795852000 |
| H | 3.237033000  | 1.338254000  | -0.885796000 |
| H | 3.576901000  | 0.212626000  | 0.939237000  |
| H | 3.647167000  | -1.506141000 | 1.344244000  |
| H | 3.962103000  | -0.976738000 | -1.151830000 |
| H | -0.276347000 | 2.038416000  | 0.344707000  |
| H | -2.789272000 | -2.148720000 | -0.108547000 |
| H | -3.062661000 | -1.357073000 | -1.681094000 |
| H | -3.706915000 | 1.167847000  | 1.781473000  |
| H | -3.741767000 | -0.597837000 | 2.054069000  |
| H | -4.446476000 | -1.703315000 | -0.586008000 |
| H | -5.065074000 | 0.188607000  | 1.146647000  |

|    |              |              |              |
|----|--------------|--------------|--------------|
| N  | 0.635348000  | 1.589289000  | 0.207471000  |
| N  | 1.693655000  | -0.634558000 | 1.414344000  |
| N  | 1.941807000  | -0.271842000 | -1.341512000 |
| O  | 0.215814000  | -2.302565000 | -0.415926000 |
| O  | -1.057436000 | 0.090009000  | -1.349973000 |
| O  | -1.159448000 | -0.396610000 | 1.142929000  |
| O  | -2.425965000 | 2.160642000  | -0.740094000 |
| Tc | 0.021320000  | -0.628327000 | -0.124458000 |

**(f) [Tc(tacn)O<sub>3</sub>]<sup>+</sup> + 2-butyne transition state**

|    |              |              |              |
|----|--------------|--------------|--------------|
| C  | 3.115374000  | 0.624510000  | 0.144727000  |
| C  | 3.118968000  | -0.623331000 | 0.158789000  |
| C  | 3.634307000  | 1.986912000  | 0.285030000  |
| C  | 3.646089000  | -1.979166000 | 0.326555000  |
| C  | -0.755606000 | -1.407690000 | 1.940497000  |
| C  | -1.168280000 | 1.058434000  | 2.090325000  |
| C  | -1.376950000 | 2.109753000  | 1.000139000  |
| C  | -1.987835000 | -1.751644000 | 1.105499000  |
| C  | -2.938125000 | -0.635489000 | -0.923043000 |
| C  | -3.027751000 | 0.766256000  | -0.322260000 |
| H  | 0.073961000  | -2.085451000 | 1.698225000  |
| H  | 0.661617000  | 0.090910000  | 1.906773000  |
| H  | 3.043688000  | 2.557025000  | 1.020078000  |
| H  | 3.066704000  | -2.533626000 | 1.082258000  |
| H  | 3.580879000  | 2.529619000  | -0.672332000 |
| H  | 3.584562000  | -2.545626000 | -0.616478000 |
| H  | 4.685436000  | 1.962542000  | 0.617684000  |
| H  | 4.700845000  | -1.941660000 | 0.646408000  |
| H  | -0.453349000 | 2.681483000  | 0.836492000  |
| H  | -0.719382000 | 1.521475000  | 2.980279000  |
| H  | -0.989265000 | -1.486122000 | 3.014728000  |
| H  | -1.597541000 | -2.198545000 | -0.879610000 |
| H  | -1.617091000 | 2.104818000  | -1.042896000 |
| H  | -2.129850000 | 0.625721000  | 2.399916000  |
| H  | -2.190538000 | 2.798208000  | 1.279587000  |
| H  | -2.204288000 | -2.826553000 | 1.172961000  |
| H  | -2.748456000 | -0.579459000 | -2.003281000 |
| H  | -2.871175000 | -1.218383000 | 1.484000000  |
| H  | -3.417263000 | 0.722484000  | 0.703908000  |
| H  | -3.725934000 | 1.380990000  | -0.906800000 |
| H  | -3.877927000 | -1.183221000 | -0.745507000 |
| N  | -0.301700000 | -0.042056000 | 1.583279000  |
| N  | -1.678552000 | 1.419764000  | -0.283592000 |
| N  | -1.779488000 | -1.357875000 | -0.323724000 |
| O  | 1.175066000  | -1.301581000 | -0.336937000 |
| O  | 1.177531000  | 1.277076000  | -0.387067000 |
| O  | -0.340328000 | -0.055105000 | -2.386209000 |
| Tc | 0.041936000  | -0.017904000 | -0.715442000 |

**(g) [Tc(tacn)O<sub>3</sub>]<sup>+</sup> + norbornene transition state**

|    |              |              |              |
|----|--------------|--------------|--------------|
| C  | 1.856362000  | 1.823393000  | -1.497318000 |
| C  | 2.255700000  | 0.923509000  | 2.063233000  |
| C  | 2.313653000  | 1.978882000  | 0.959504000  |
| C  | 2.846140000  | 0.698113000  | -1.792671000 |
| C  | 3.275766000  | -1.447714000 | -0.581116000 |
| C  | 3.518403000  | -0.826861000 | 0.794019000  |
| C  | -2.564463000 | 0.962085000  | 0.659521000  |
| C  | -2.565882000 | 0.920900000  | -0.720554000 |
| C  | -3.241633000 | -1.211276000 | 0.034357000  |
| C  | -3.475034000 | -0.153015000 | 1.137059000  |
| C  | -3.477274000 | -0.220601000 | -1.128969000 |
| C  | -4.927144000 | 0.318949000  | 0.772025000  |
| C  | -4.928798000 | 0.272105000  | -0.789874000 |
| H  | 0.495911000  | 2.230232000  | -0.005783000 |
| H  | 0.989829000  | 1.759599000  | -2.169135000 |
| H  | 1.325604000  | 1.021105000  | 2.639549000  |
| H  | 1.972082000  | -1.145747000 | -2.147298000 |
| H  | 1.977121000  | -1.113736000 | 2.152271000  |
| H  | 2.105617000  | 2.974089000  | 1.376374000  |
| H  | 2.344744000  | 2.803404000  | -1.621815000 |
| H  | 2.827375000  | -2.444996000 | -0.479474000 |
| H  | 3.067069000  | 0.660493000  | -2.868249000 |
| H  | 3.119505000  | 1.027732000  | 2.739067000  |
| H  | 3.316854000  | 2.016982000  | 0.513020000  |
| H  | 3.797803000  | 0.874165000  | -1.271875000 |
| H  | 4.051823000  | -1.539557000 | 1.437853000  |
| H  | 4.151022000  | 0.067097000  | 0.707537000  |
| H  | 4.227396000  | -1.529878000 | -1.130838000 |
| H  | -2.228795000 | -1.636179000 | 0.046035000  |
| H  | -2.286858000 | 1.823197000  | 1.266966000  |
| H  | -2.289156000 | 1.744267000  | -1.378504000 |
| H  | -3.346071000 | -0.468675000 | 2.180170000  |
| H  | -3.350421000 | -0.597928000 | -2.151660000 |
| H  | -3.987919000 | -2.021653000 | 0.059382000  |
| H  | -5.145098000 | 1.320997000  | 1.170822000  |
| H  | -5.147930000 | 1.248399000  | -1.247553000 |
| H  | -5.662746000 | -0.384817000 | 1.192090000  |
| H  | -5.665009000 | -0.455793000 | -1.165437000 |
| N  | 1.334834000  | 1.654070000  | -0.118260000 |
| N  | 2.225938000  | -0.424539000 | 1.436390000  |
| N  | 2.296572000  | -0.614938000 | -1.333877000 |
| O  | 0.434519000  | -2.195551000 | 0.058337000  |
| O  | -0.554651000 | 0.050802000  | -1.326560000 |
| O  | -0.558625000 | 0.126723000  | 1.312339000  |
| Tc | 0.429166000  | -0.479571000 | 0.010663000  |

**(h)[Tc(tacn)O<sub>3</sub>]<sup>+</sup> + propene transition state**

|    |              |              |              |
|----|--------------|--------------|--------------|
| C  | 1.226172000  | -0.305333000 | 2.325489000  |
| C  | 1.253011000  | 2.291391000  | -0.303457000 |
| C  | 1.412224000  | 1.157701000  | 1.925664000  |
| C  | 2.285661000  | 1.424337000  | -1.019776000 |
| C  | 2.592616000  | -1.057677000 | -1.026969000 |
| C  | 2.656931000  | -1.233618000 | 0.489740000  |
| C  | -3.035332000 | 1.260113000  | -0.603601000 |
| C  | -3.284587000 | 0.499652000  | 0.540754000  |
| C  | -4.098257000 | -0.762357000 | 0.484877000  |
| H  | 0.228242000  | -0.460021000 | 2.758365000  |
| H  | 0.471322000  | 2.614220000  | -1.004517000 |
| H  | 0.973448000  | -2.093873000 | 1.342511000  |
| H  | 1.145940000  | 1.815186000  | 2.764960000  |
| H  | 1.495169000  | 0.060602000  | -2.363173000 |
| H  | 1.738271000  | 3.177261000  | 0.137854000  |
| H  | 1.994958000  | -0.606104000 | 3.055039000  |
| H  | 2.150141000  | -1.945662000 | -1.497587000 |
| H  | 2.462398000  | 1.361967000  | 1.675218000  |
| H  | 2.637324000  | 1.928115000  | -1.930623000 |
| H  | 3.117448000  | -2.200906000 | 0.733544000  |
| H  | 3.164123000  | 1.261961000  | -0.379254000 |
| H  | 3.284872000  | -0.454365000 | 0.942663000  |
| H  | 3.605846000  | -0.898709000 | -1.430487000 |
| H  | -0.278029000 | 1.951725000  | 1.031162000  |
| H  | -2.786049000 | 2.318342000  | -0.512390000 |
| H  | -3.216183000 | 1.000081000  | 1.510263000  |
| H  | -3.456987000 | 0.939524000  | -1.559351000 |
| H  | -3.817827000 | -1.453277000 | 1.294100000  |
| H  | -3.964072000 | -1.272010000 | -0.482356000 |
| H  | -5.171484000 | -0.527241000 | 0.600841000  |
| N  | 0.575808000  | 1.472846000  | 0.732300000  |
| N  | 1.289374000  | -1.149695000 | 1.102069000  |
| N  | 1.700317000  | 0.090009000  | -1.360316000 |
| O  | -0.298317000 | -1.889311000 | -1.176816000 |
| O  | -1.184216000 | 0.809816000  | -1.290766000 |
| O  | -1.494380000 | -0.433758000 | 0.955007000  |
| Tc | -0.301690000 | -0.394143000 | -0.343742000 |
